# Supplementary material
Source: PubMed Central journal article supplement (PMC4766997)
Supplement: 10.1194_P055699_jlr.P055699-1.pdf [file 10.1194_P055699_jlr.P055699-1.pdf]

**Table S1 : List of primers for PCR amplification of *LDLR*, *PCSK9*, exon 26 of *APOB* and *APOE* genes. And list of primers for splicing reporter minigene assay and Sanger sequencing of the RT-PCR products.**

| <b>LDLR</b><br>OMIM#606945 | <b>Forward</b>                |             | <b>Reverse</b>          | <b>Length</b> |
|----------------------------|-------------------------------|-------------|-------------------------|---------------|
| Promotor-F                 | TCAGTGTCTATTAGGTGATTTGGAATAAC | Promotor-R  | TGGCTTCCCGCGATTG        | 551pb         |
| Exon1-F                    | TCCTCCCCCTGCTAGAAACC          | Exon1-R     | CCAGCCGTTTGGGAAGG       | 351pb         |
| Exon2-F                    | TTTTCCCATACCCAGAGAGTC         | Exon2-R     | TCATTCTCTCCCCACCTCCTAAT | 651pb         |
| Exon3-F                    | TCAGTGGGTCTTTCTTTGAGTG        | Exon3-R     | AGCGGCTTGCCAGTGTGT      | 452pb         |
| Exon4-F                    | GAGGAAACTGAGGCACCGAG          | Exon4-R     | TCCACTTCGGCACCTAAATCA   | 651pb         |
| Exon5-F                    | GCAAAAAGGCCCTGCTTCTTT         | Exon5-R     | GCAAGCAGCAAGGCACAGA     | 251pb         |
| Exon6-F                    | TTTGCATGCGTTCTTATGTGAAT       | Exon6-R     | TCTGCAAGCCGCCTGC        | 256pb         |
| Exon7-F                    | CCTGGCACCCACCATTCTAC          | Exon7-R     | CCATGTCTCAGGAAGCGCAGA   | 751pb         |
| Exon8-F                    | GGTCCCGTGGTGAATGATG           | Exon8-R     | GAGCCCTCAGGAGCAAACAG    | 451pb         |
| Exon9-10-F                 | GGTGCCTCCTCTGGCTCAG           | Exon9-10-R  | TTCTGCTCCCTCCATTCC      | 651pb         |
| Exon11-F                   | CCTGAGCCTGGCTGTTTCTTC         | Exon11-R    | GCTTGTCCCAGAGCCACCT     | 301pb         |
| Exon12-F                   | TGGAGAGGGCGTCACAGG            | Exon12-R    | TGCGTTCATCTTGGCTTGAGT   | 401pb         |
| Exon13-14-F                | TGGCCTGTGTCTCATCCCA           | Exon13-14-R | CAAGCCCGGTGCTGATGT      | 651pb         |
| Exon15-F                   | CTTTCGTCATTAGGCACACA          | Exon15-R    | TTGCAAAGAGGGCAAGAAGT    | 451pb         |
| Exon16-F                   | CCGAATTGAGTCTACAACCT          | Exon16-R    | GAGGCTATTCCACAGCACGG    | 501pb         |
| Exon17-F                   | CGCAAGGCGATCTCTAAACAA         | Exon17-R    | CCGCTGACATTCTGAATGAGC   | 451pb         |
| Exon18-F                   | GCAGGAGGCTACCAGGCAG           | Exon18-R    | CATTGCATGGGCACTGTCC     | 451pb         |

| <b>APOB</b><br>OMIM#107730 | <b>Forward</b>         |             | <b>Reverse</b>         | <b>Lenght</b> |
|----------------------------|------------------------|-------------|------------------------|---------------|
| Ex26-3500-F                | CATCTGTCATTGATGCACTGCA | Ex26-3500-R | GGCTTTGCTTGTATGTTCTCCG | 650pb         |

| <b>PCSK9</b><br>OMIM#607786 | <b>Forward</b>         |          | <b>Reverse</b>              | <b>Length</b> |
|-----------------------------|------------------------|----------|-----------------------------|---------------|
| Exon1-F                     | TGAACTTCAGCTCCTGCACA   | Exon1-R  | GCGAACCTTCCCCTGAATA         | 591pb         |
| Exon2-F                     | CCTGAATGGCACATTTGAAAG  | Exon2-R  | TGCTCAATACATACTTGCTGTCC     | 542pb         |
| Exon3-F                     | TGTTTGCTGCTGTCCAAATG   | Exon3-R  | GGCAGAGCAAATGGATTCAG        | 243pb         |
| Exon4-F                     | CAGACTCGGTGAGCTGTGAA   | Exon4-R  | AGGGAGGGGACAGTGACAG         | 644pb         |
| Exon5-F                     | GCTTCCACAGACAGGTAAGCAC | Exon5-R  | GGGTTCTTCATCTGCACTCG        | 583pb         |
| Exon6-F                     | TTCGCAGCAGCATTCCAC     | Exon6-R  | TCCAAAGCCAGAAGGGTTC         | 482pb         |
| Exon7-F                     | AGTCAGATTTTCCTTAGGAGGG | Exon7-R  | ACTGAGTGCCTTGAAGGCAC        | 476pb         |
| Exon8-F                     | TGTCTGTGTGCACGTGTGTT   | Exon8-R  | CAGACAAGGGAGAAGGGAGA        | 378pb         |
| Exon9-F                     | GTAAGGAGGATGACGCCACC   | Exon9-R  | AAGAGCTGGAGTCTGGAGGAT       | 466pb         |
| Exon10-F                    | AGCTCCTTGTCCCAGAAG     | Exon10-R | GAGTATGGAAGTCAAGTCAGGCTTGAG | 448pb         |
| Exon11-F                    | GGCTCAGAGAGGTTGAATGG   | Exon11-R | GCATCTACCTGGCAAACCG         | 534pb         |
| Exon12-F                    | TGGTAGGCATCTGTCTATCTCC | Exon12-R | GAAGCATCCCCATCCCC           | 597pb         |

| <b>APOE</b><br>OMIM#107741 | <b>Forward</b>                 |                   | <b>Reverse</b>                 | <b>Length</b> |
|----------------------------|--------------------------------|-------------------|--------------------------------|---------------|
| <b>PROMOTOR-F</b>          | <b>GCCCCCTCTCCAGATTACAT</b>    | <b>PROMOTOR-R</b> | <b>GCTGGGGCTGAGTAGGACT</b>     | <b>356pb</b>  |
| <b>Exon1-F</b>             | <b>GGGAGAACAGCCACCTCGT</b>     | <b>Exon1-R</b>    | <b>CCCCTGGCTCCCAGTTATG</b>     | <b>450pb</b>  |
| <b>Exon2-F</b>             | <b>GAGTTAAATAGGGAATGGTTGG</b>  | <b>Exon2-R</b>    | <b>TGAGGATGAGAGGGGGAGGAG</b>   | <b>293pb</b>  |
| <b>Exon3-F</b>             | <b>TCCAAAGAAGCATTGTGGAGCA</b>  | <b>Exon3-R</b>    | <b>GCCAGGAGTCAGAAATGGGAAGA</b> | <b>442pb</b>  |
| <b>Exon4a-F</b>            | <b>GGCCTGGGTCTCTGCTGGTT</b>    | <b>Exon4a-R</b>   | <b>TTCTGCAGGTCATCGGCATC</b>    | <b>773pb</b>  |
| <b>Exon4b-F</b>            | <b>GAAGGCCTACAAATCGGAACTGG</b> | <b>Exon4b-R</b>   | <b>GGCCAGCAGATGCGTGAAAC</b>    | <b>840pb</b>  |
|                            |                                |                   |                                |               |

List of primers for minigene splicing assay

| Name          | Sequence             | Position    | Analysed variant of<br><i>LDLR</i> |
|---------------|----------------------|-------------|------------------------------------|
| RLDL Exon3 L  | CAAAGACAGGATTGGCAAGG | c.191-379   | c.313+5G>T                         |
| RLDL Exon3 R  | CGGAAGAGGCTTGGTATGAG | c.313+146   |                                    |
| RLDL Exon 4 L | AGCAGTGCTGGGAAATGTG  | c.314-200   | c.686A>T                           |
| RLDL Exon 4 R | TTTCTTGGCATGTTGTTGG  | c.694+119   |                                    |
| RLDL Exon15 F | CTCCAAGGTCATTTGAGAC  | c.2141-350, | c.2311G>A                          |
| RLDL Exon15 R | CAAGTGAGAGAAGGTCAGCA | c.2311+300, |                                    |

**Vector exonic primers for RT-PCR**

| Name                 | Sequence                  | Vector exon |                                                   |
|----------------------|---------------------------|-------------|---------------------------------------------------|
| Alpha2-3globine<br>F | CAACTTCAAGCTCCTAAGCCACTG  | exons 2-3   | from: D. Baralle, J Med<br>Genet 2005; 42:737-748 |
| B2 fibronectine R    | GGTCACCAGGAAGTTGGTTAAATCA | exon 4      |                                                   |
