# Supplementary material
Source: PubMed Central journal article supplement (PMC4766997)
Supplement: 10.1194_P055699_jlr.P055699-4.pdf [file 10.1194_P055699_jlr.P055699-4.pdf]

**Table S4. *LDLR* variants with negative *in silico* predictions.**

| Variant           | <i>In silico</i> analysis                                                                                               |                                                                         |                                                                       |                                                                        |
|-------------------|-------------------------------------------------------------------------------------------------------------------------|-------------------------------------------------------------------------|-----------------------------------------------------------------------|------------------------------------------------------------------------|
|                   | SSFL [0-100]<br>WT→ Mutant                                                                                              | MES [0-12]<br>WT→ Mutant                                                | NNSP [0-1]<br>WT→ Mutant                                              | HSF [0-100]<br>WT→ Mutant                                              |
| Donor             |                                                                                                                         |                                                                         |                                                                       |                                                                        |
| c.1167G>A         | No change for the physiological splice site at c.1186                                                                   |                                                                         |                                                                       |                                                                        |
| c.1977C>A         | No change for the physiological splice site at c.1987                                                                   |                                                                         |                                                                       |                                                                        |
| c.2211G>T         | — → 75<br><i>(Physiological splice site at c.2311: 82.5)</i>                                                            | 5.4 → 10<br>(+85,2%)<br><i>(Physiological splice site at c.2311: 9)</i> | 0.9 → 1<br>(+4.9%)<br><i>(Physiological splice site at c.2311: 1)</i> | 81 → 83<br>(+2,4%)<br><i>(Physiological splice site at c.2311: 85)</i> |
| Acceptor          |                                                                                                                         |                                                                         |                                                                       |                                                                        |
| c.1706-10G>A      | 74.8 → 74.7<br>(-0.1%)                                                                                                  | 7.9 → 7.0<br>(-11.8%)                                                   | — → 0.41                                                              | 79.7 → 79.6<br>(-0.1%)                                                 |
| c.2106G>A         | No change for the physiological splice site at c.1988                                                                   |                                                                         |                                                                       |                                                                        |
| Donor or Acceptor |                                                                                                                         |                                                                         |                                                                       |                                                                        |
| c.1920C>T         | No change in neither the physiological acceptor splice site at c.1846 nor the physiological donor splice site at c.1987 |                                                                         |                                                                       |                                                                        |
