# Supplementary material
Source: PubMed Central journal article supplement (PMC4766997)

**Figure S2. Sequence analysis of the RT-PCR products from plasmid constructions containing the three *LDLR* variants c.313+5G>T (A), c.686A>T (B) and c.2311G>A (C)**

**(A) Minigene 313+5A>T**

**RT-PCR product of the wild type (not shown) = 369 bp.**

**a) Using of the cryptic site c.263: RT-PCR product = 318 bp.**

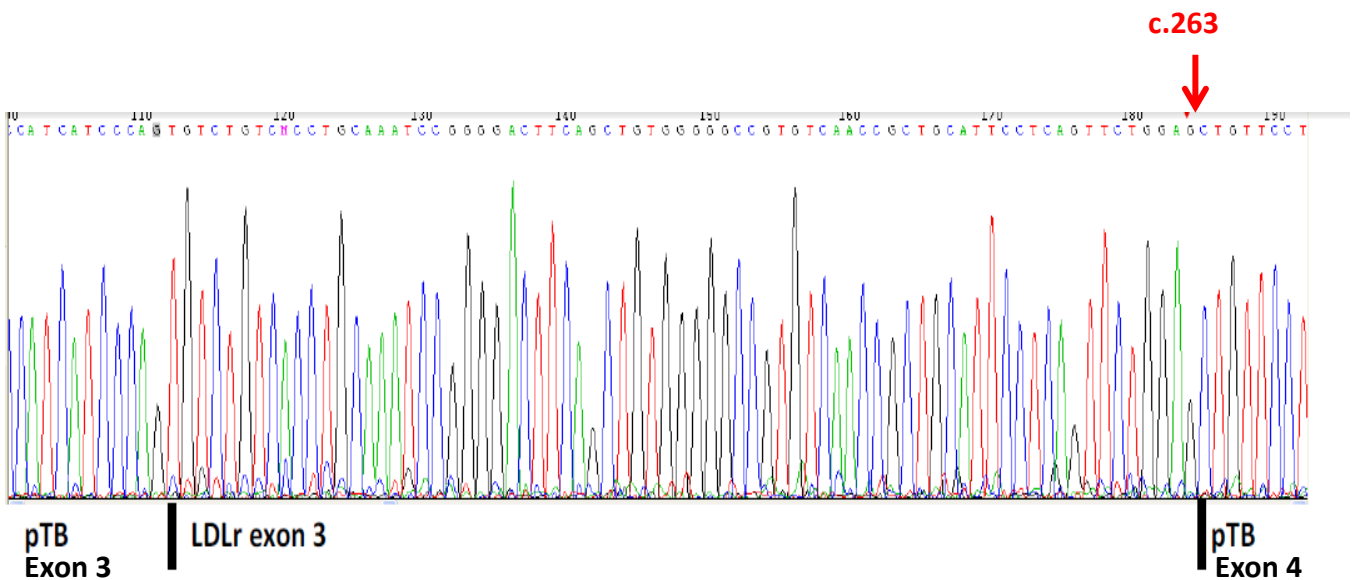

**b) Exon skipping: RT-PCR product = 248 bp.**

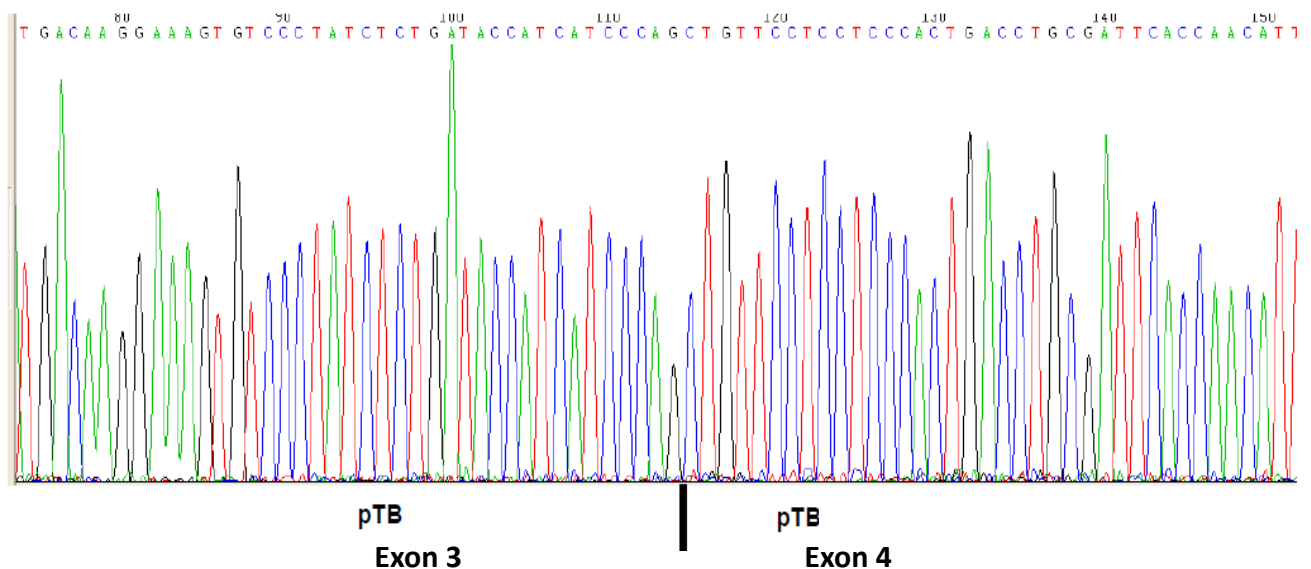

**(B) Minigene 686A>T**

**a) RT-PCR product of the wild type (nature splice site in c.694) = 627 bp.**

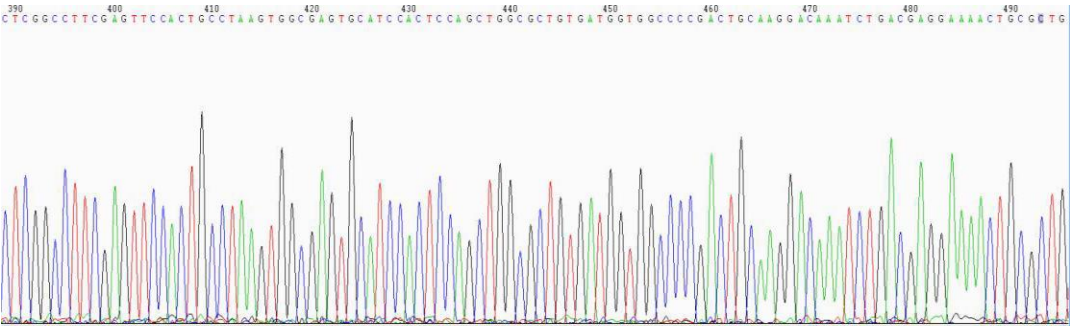

End of LDLR exon 4 | pTB  
Exon 4

**b) Using of the cryptic site c.684: RT-PCR product = 617 bp.**

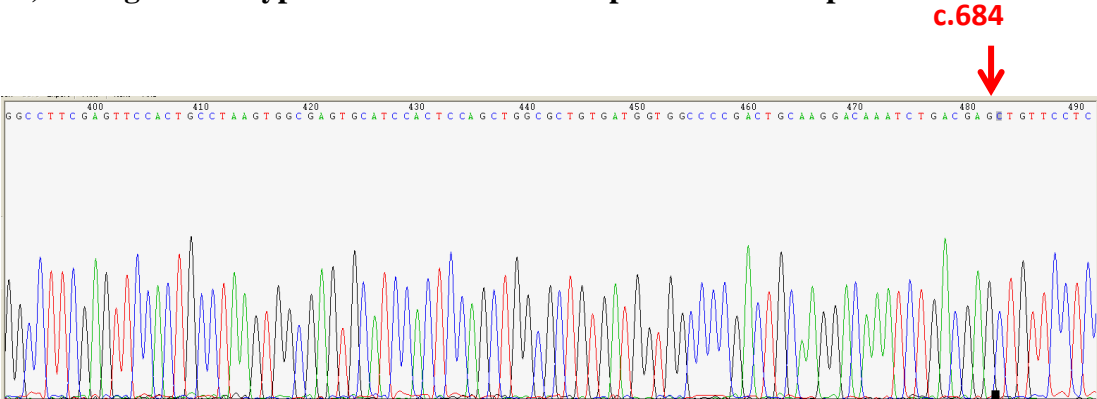

c.684

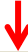

pTB  
Exon 4

**(C) Minigene 2311G>A**

**RT-PCR product of the wild type (not shown) = 417 bp.**

**a) Using of the cryptic site c.2190: RT PCR product =296 bp.**

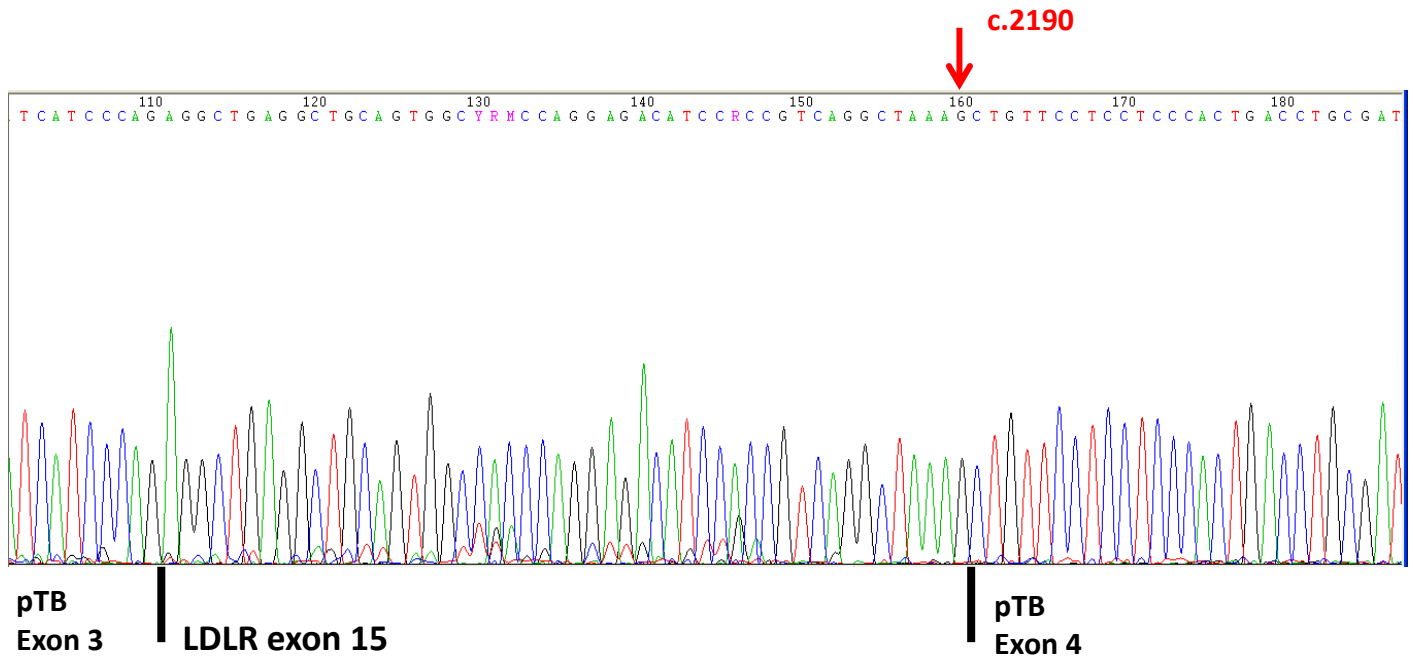

**b) Using of the cryptic site c.2311+90: RT PCR product = 507 bp.**

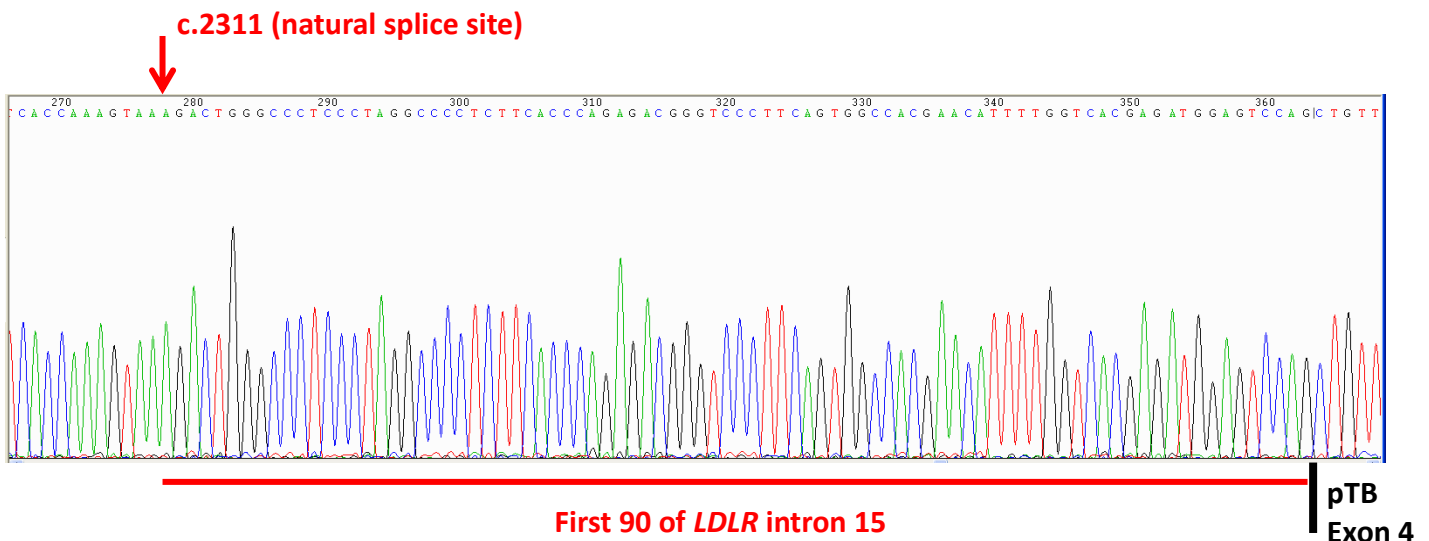

Supplement: 10.1194_P055699_jlr.P055699-6.pdf [file 10.1194_P055699_jlr.P055699-6.pdf]
