# Supplementary material
Source: PubMed Central journal article supplement (PMC4766997)

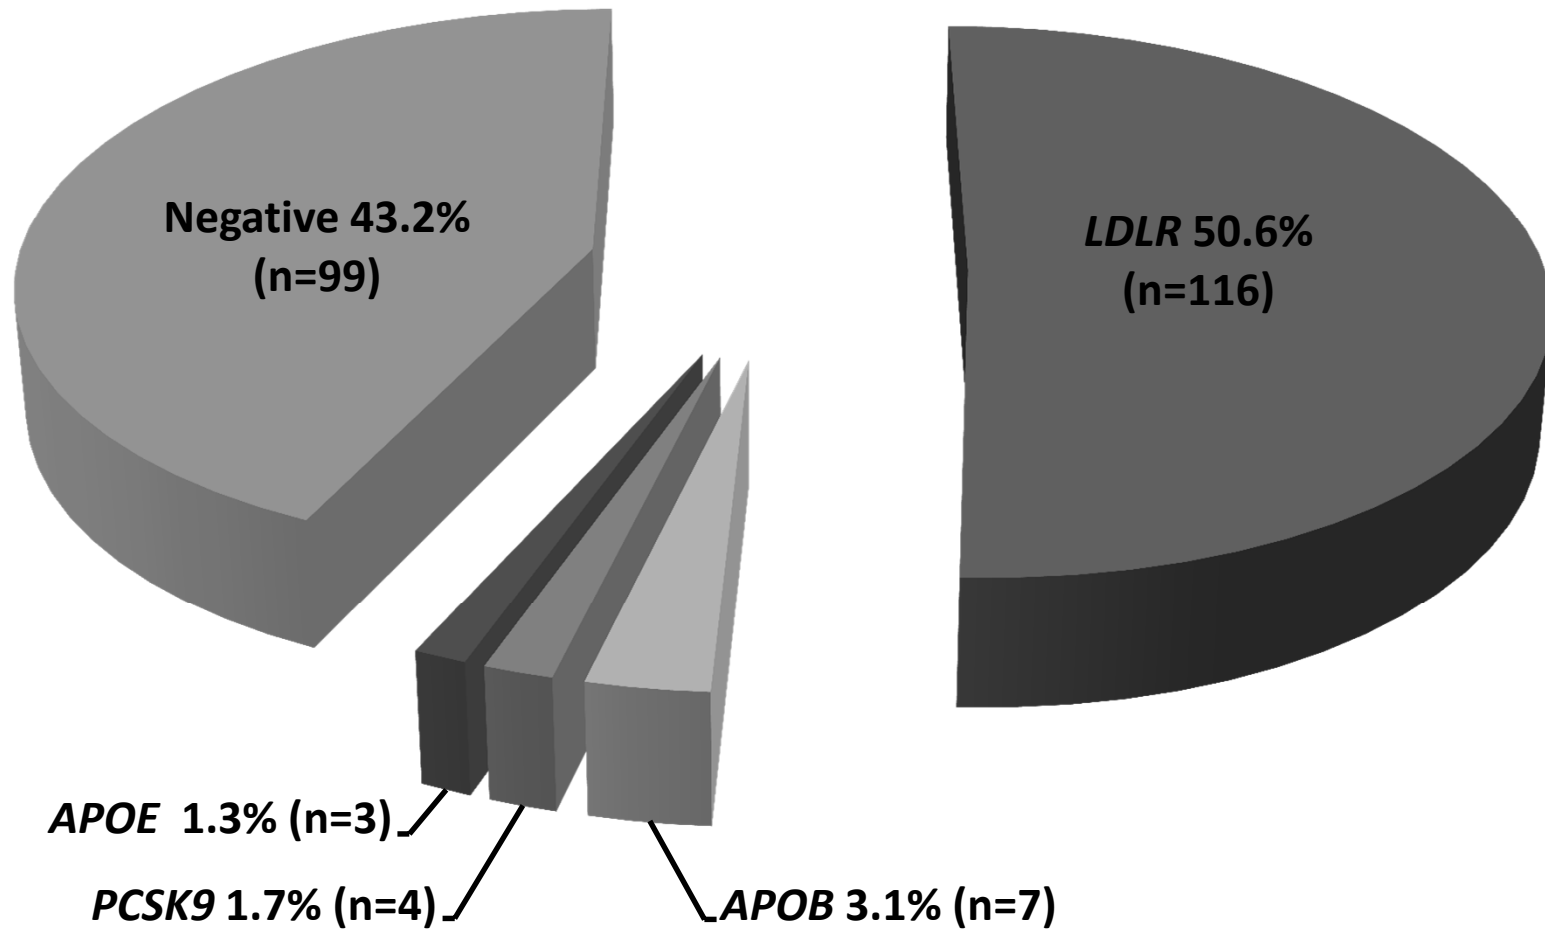

Supplement: 10.1194_P055699_jlr.P055699-5.pdf [file 10.1194_P055699_jlr.P055699-5.pdf]
